# Supplementary material
Source: PubMed Central journal article supplement (PMC8479757)
Supplement: NIHMS1626512-supplement-1.pdf [file NIHMS1626512-supplement-1.pdf]

## **SUPPORTING MATERIAL**

### **Dominant Entropic Binding of Perfluoroalkyl Substances (PFASs) to Albumin Protein Revealed by $^{19}\text{F}$ NMR**

Michael Fedorenko,<sup>†</sup> Jessica Alesio,<sup>†</sup> Anatoliy Fedorenko,<sup>†</sup> Angela Slitt<sup>§</sup> and Geoffrey D.  
Bothun<sup>\*,†</sup>

<sup>†</sup>Department of Chemical Engineering, University of Rhode Island, 2 East Alumni Ave,  
Kingston, RI, 02881, USA

<sup>§</sup>Department of Biomedical & Pharmaceutical Sciences, University of Rhode Island, 7  
Greenhouse Rd, Kingston, RI, 02881, USA.

Keywords: PFAS; protein binding; albumin; NMR

\*Corresponding author: Geoffrey D. Bothun. E-mail: gbothun@uri.edu, Tel: +1-401-874-9518

The Supporting Material contains the  $^{19}\text{F}$  NMR spectra of perfluorooctanoic acid (PFOA), perfluorononanoic acid (PFNA), perfluorohexanesulfonic acid (PFHxS), and perfluorooctanesulfonic acid (PFOS) as-received from AccuStandard ((New Haven, CT).

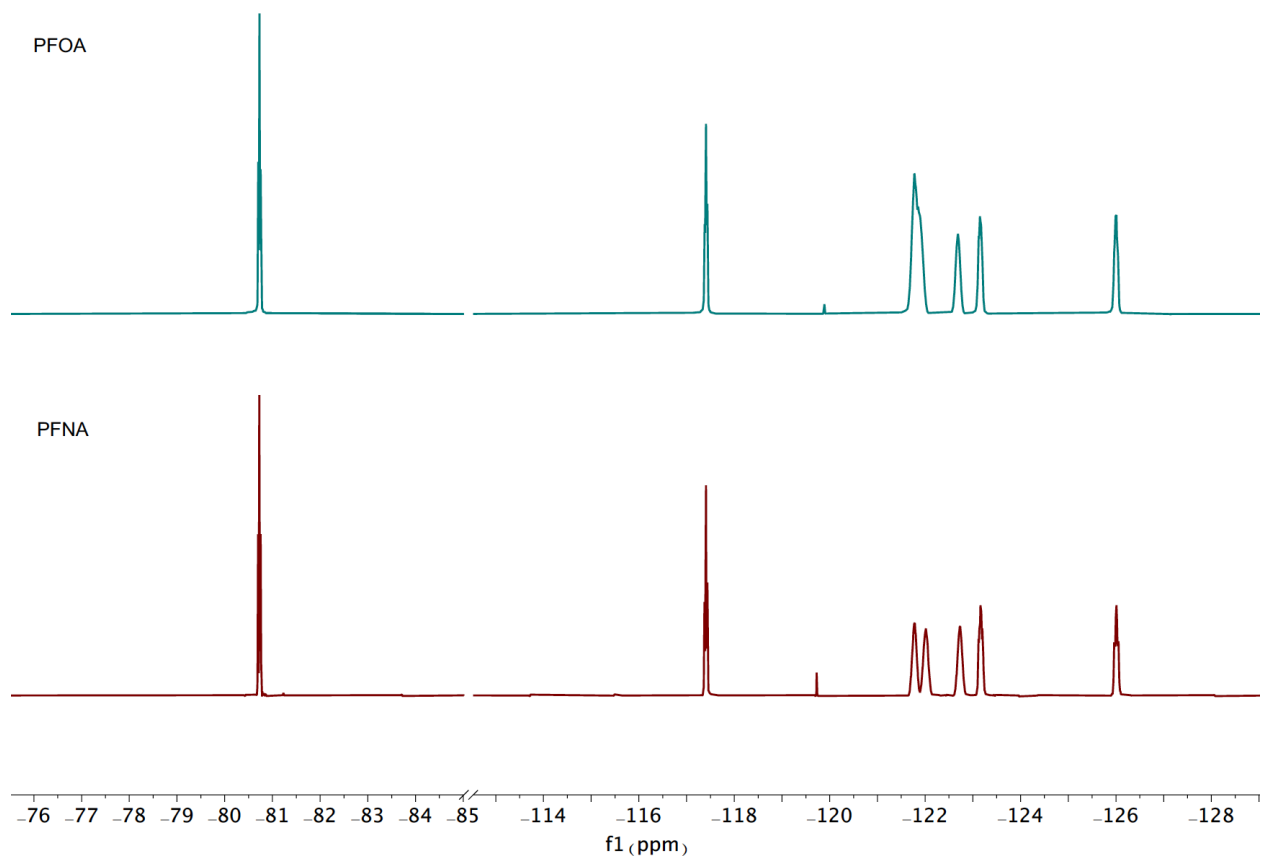

Figure S1.  $^{19}\text{F}$  NMR spectra for 1 mM PFOA (top, teal) and PFNA (bottom, red) in pH 7.4 phosphate buffered saline at 298 K as-received.

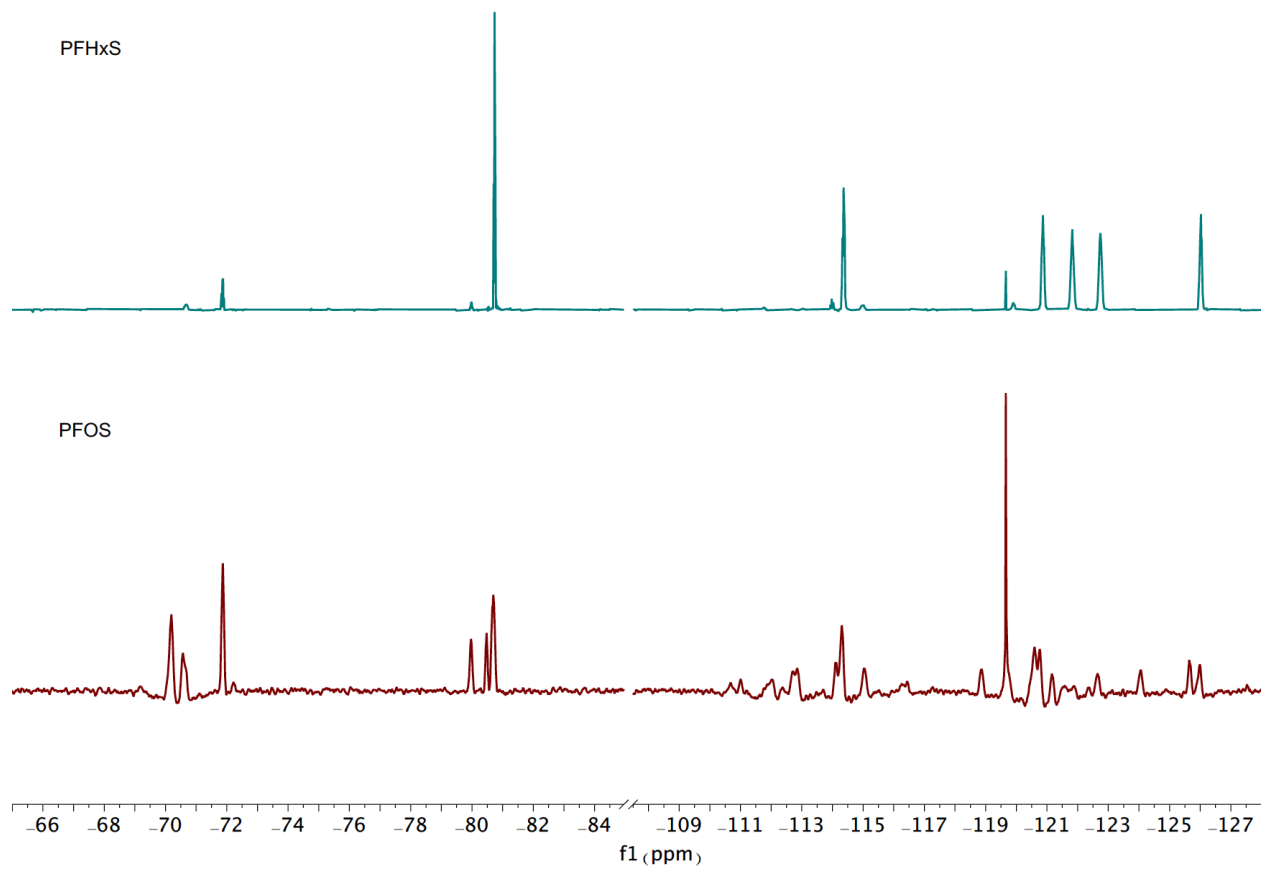

Figure S2.  $^{19}\text{F}$  NMR spectra for 1 mM PFHxS (top, teal) and PFOS (bottom, red) in pH 7.4 phosphate buffered saline at 298 K as-received.
